# Supplementary material for: Bacteriogenic synthesis of morphologically diverse silver nanoparticles and their assessment for methyl orange dye removal and antimicrobial activity
Source: PeerJ. 2024 May 17;12:e17328. doi: 10.7717/peerj.17328 (PMC11104345; doi:10.7717/peerj.17328)
Supplement: Supplemental Information 1 [file peerj-12-17328-s001.xlsx]

## Sheet: Dye removal by AgNPs-E
Wavelength	0 min	30 mins	60 mins	90 mins	120 mins
nm	Absorbance	Absorbance	Absorbance	Absorbance	Absorbance
400	2.062	2.046	2.018	2.011	2.019
401	2.097	2.085	2.062	2.044	2.055
402	2.13	2.12	2.092	2.079	2.082
403	2.167	2.149	2.125	2.114	2.114
404	2.197	2.181	2.156	2.14	2.146
405	2.224	2.219	2.192	2.174	2.176
406	2.27	2.245	2.224	2.21	2.211
407	2.298	2.274	2.247	2.242	2.238
408	2.326	2.322	2.277	2.271	2.271
409	2.357	2.344	2.31	2.297	2.306
410	2.383	2.374	2.345	2.32	2.328
411	2.415	2.409	2.368	2.353	2.359
412	2.451	2.436	2.399	2.385	2.384
413	2.475	2.458	2.436	2.41	2.412
414	2.513	2.489	2.457	2.437	2.437
415	2.528	2.524	2.497	2.467	2.471
416	2.55	2.543	2.51	2.483	2.502
417	2.575	2.563	2.524	2.508	2.517
418	2.597	2.59	2.562	2.532	2.539
419	2.631	2.604	2.577	2.564	2.564
420	2.65	2.641	2.601	2.587	2.576
421	2.693	2.654	2.631	2.609	2.614
422	2.698	2.688	2.658	2.636	2.647
423	2.717	2.714	2.685	2.654	2.658
424	2.744	2.741	2.703	2.676	2.68
425	2.773	2.772	2.711	2.722	2.718
426	2.799	2.799	2.74	2.742	2.749
427	2.837	2.808	2.779	2.754	2.76
428	2.86	2.823	2.801	2.768	2.774
429	2.874	2.861	2.818	2.801	2.808
430	2.907	2.867	2.836	2.82	2.825
431	2.939	2.909	2.882	2.829	2.851
432	2.94	2.898	2.875	2.866	2.863
433	2.956	2.944	2.901	2.883	2.884
434	2.985	2.974	2.939	2.906	2.913
435	2.999	2.999	2.94	2.954	2.927
436	3.009	2.986	2.968	2.96	2.944
437	3.067	3.028	3	2.994	2.995
438	3.066	3.036	3.029	2.985	3.008
439	3.089	3.086	3.051	3.004	3.013
440	3.096	3.091	3.066	3.015	3.034
441	3.159	3.092	3.082	3.08	3.069
442	3.169	3.164	3.108	3.076	3.071
443	3.157	3.161	3.107	3.104	3.111
444	3.178	3.161	3.128	3.121	3.153
445	3.24	3.182	3.185	3.112	3.131
446	3.241	3.244	3.161	3.149	3.149
447	3.242	3.239	3.182	3.186	3.163
448	3.241	3.241	3.214	3.189	3.198
449	3.29	3.275	3.206	3.197	3.217
450	3.307	3.286	3.248	3.242	3.215
451	3.346	3.272	3.26	3.252	3.24
452	3.341	3.359	3.269	3.244	3.254
453	3.382	3.331	3.289	3.294	3.243
454	3.356	3.367	3.282	3.262	3.251
455	3.381	3.355	3.288	3.249	3.3
456	3.428	3.376	3.3	3.301	3.311
457	3.404	3.42	3.324	3.312	3.298
458	3.429	3.408	3.355	3.335	3.323
459	3.408	3.389	3.36	3.317	3.317
460	3.41	3.393	3.358	3.356	3.321
461	3.459	3.422	3.357	3.335	3.361
462	3.425	3.377	3.365	3.317	3.332
463	3.466	3.413	3.384	3.337	3.322
464	3.432	3.398	3.411	3.346	3.31
465	3.43	3.425	3.357	3.303	3.332
466	3.454	3.38	3.331	3.322	3.325
467	3.419	3.418	3.363	3.337	3.357
468	3.392	3.378	3.353	3.341	3.338
469	3.393	3.404	3.326	3.275	3.319
470	3.363	3.371	3.339	3.308	3.309
471	3.395	3.351	3.322	3.31	3.307
472	3.364	3.333	3.278	3.294	3.279
473	3.353	3.313	3.273	3.245	3.268
474	3.309	3.339	3.263	3.228	3.264
475	3.299	3.295	3.248	3.22	3.221
476	3.273	3.275	3.215	3.201	3.206
477	3.25	3.259	3.191	3.161	3.185
478	3.235	3.237	3.182	3.144	3.166
479	3.215	3.198	3.147	3.128	3.129
480	3.187	3.176	3.122	3.093	3.113
481	3.151	3.143	3.09	3.075	3.086
482	3.139	3.099	3.075	3.029	3.042
483	3.082	3.062	3.015	3.002	3.019
484	3.058	3.019	2.993	2.966	2.982
485	3.017	2.993	2.959	2.934	2.939
486	2.974	2.961	2.928	2.891	2.906
487	2.939	2.923	2.884	2.856	2.86
488	2.891	2.878	2.845	2.814	2.828
489	2.863	2.838	2.793	2.773	2.784
490	2.811	2.795	2.759	2.727	2.741
491	2.765	2.746	2.71	2.682	2.693
492	2.718	2.7	2.662	2.64	2.647
493	2.675	2.655	2.615	2.589	2.606
494	2.623	2.602	2.569	2.544	2.549
495	2.569	2.547	2.518	2.49	2.501
496	2.515	2.498	2.463	2.443	2.448
497	2.465	2.447	2.414	2.392	2.399
498	2.409	2.392	2.358	2.335	2.346
499	2.354	2.337	2.309	2.283	2.294
500	2.295	2.28	2.251	2.225	2.236
501	2.24	2.221	2.193	2.17	2.178
502	2.182	2.164	2.136	2.112	2.123
503	2.126	2.109	2.082	2.059	2.068
504	2.067	2.051	2.023	2.003	2.01
505	2.007	1.994	1.965	1.945	1.951
506	1.95	1.936	1.91	1.891	1.897
507	1.892	1.879	1.855	1.834	1.842
508	1.834	1.821	1.798	1.777	1.785
509	1.778	1.764	1.743	1.723	1.73
510	1.724	1.71	1.689	1.668	1.676
511	1.667	1.653	1.633	1.613	1.62
512	1.611	1.597	1.577	1.559	1.564
513	1.556	1.545	1.524	1.508	1.511
514	1.5	1.49	1.469	1.453	1.458
515	1.444	1.435	1.416	1.4	1.405
516	1.395	1.385	1.368	1.352	1.357
517	1.342	1.332	1.317	1.3	1.306
518	1.292	1.281	1.267	1.252	1.256
519	1.242	1.231	1.216	1.202	1.206
520	1.194	1.184	1.169	1.157	1.159
521	1.146	1.137	1.121	1.11	1.112
522	1.097	1.089	1.074	1.063	1.066
523	1.053	1.046	1.032	1.02	1.023
524	1.008	1.001	0.989	0.977	0.98
525	0.964	0.957	0.946	0.934	0.938
526	0.923	0.915	0.904	0.893	0.896
527	0.882	0.874	0.864	0.853	0.855
528	0.843	0.835	0.825	0.815	0.817
529	0.804	0.797	0.786	0.778	0.779
530	0.767	0.761	0.75	0.743	0.743
531	0.731	0.726	0.716	0.708	0.709
532	0.696	0.691	0.682	0.674	0.675
533	0.663	0.658	0.651	0.642	0.643
534	0.632	0.627	0.62	0.611	0.612
535	0.601	0.595	0.589	0.581	0.582
536	0.571	0.566	0.559	0.552	0.552
537	0.542	0.537	0.531	0.524	0.524
538	0.516	0.511	0.504	0.499	0.498
539	0.49	0.486	0.479	0.474	0.473
540	0.465	0.461	0.455	0.449	0.449
541	0.442	0.438	0.433	0.427	0.427
542	0.42	0.416	0.411	0.405	0.405
543	0.397	0.394	0.389	0.383	0.383
544	0.377	0.373	0.369	0.363	0.363
545	0.358	0.354	0.349	0.344	0.343
546	0.339	0.335	0.331	0.327	0.325
547	0.321	0.318	0.314	0.309	0.308
548	0.305	0.302	0.298	0.293	0.292
549	0.288	0.285	0.282	0.277	0.276
550	0.272	0.27	0.267	0.262	0.261
551	0.258	0.255	0.253	0.248	0.247
552	0.245	0.242	0.24	0.235	0.234
553	0.233	0.229	0.227	0.223	0.221
554	0.221	0.218	0.215	0.211	0.21
555	0.21	0.207	0.205	0.201	0.199
556	0.199	0.197	0.195	0.191	0.189
557	0.19	0.187	0.185	0.182	0.18
558	0.181	0.178	0.177	0.173	0.171
559	0.173	0.17	0.168	0.165	0.163
560	0.165	0.162	0.161	0.157	0.156
561	0.158	0.155	0.153	0.15	0.148
562	0.15	0.148	0.146	0.143	0.141
563	0.144	0.142	0.14	0.137	0.135
564	0.138	0.136	0.134	0.131	0.129
565	0.132	0.13	0.129	0.125	0.124
566	0.127	0.125	0.124	0.12	0.119
567	0.122	0.12	0.119	0.115	0.114
568	0.118	0.116	0.115	0.111	0.109
569	0.113	0.111	0.11	0.107	0.105
570	0.109	0.107	0.106	0.103	0.101
571	0.106	0.104	0.103	0.099	0.098
572	0.102	0.1	0.099	0.096	0.094
573	0.099	0.097	0.096	0.093	0.091
574	0.096	0.094	0.093	0.09	0.088
575	0.093	0.091	0.09	0.087	0.086
576	0.09	0.089	0.088	0.084	0.083
577	0.088	0.086	0.085	0.082	0.081
578	0.086	0.084	0.083	0.08	0.078
579	0.083	0.082	0.081	0.078	0.076
580	0.081	0.08	0.079	0.076	0.074
581	0.079	0.078	0.077	0.074	0.072
582	0.078	0.076	0.075	0.072	0.071
583	0.076	0.074	0.074	0.07	0.069
584	0.075	0.073	0.072	0.069	0.067
585	0.073	0.071	0.071	0.067	0.066
586	0.072	0.07	0.069	0.066	0.065
587	0.07	0.069	0.068	0.065	0.063
588	0.069	0.067	0.067	0.063	0.062
589	0.068	0.066	0.065	0.062	0.061
590	0.066	0.065	0.064	0.061	0.06
591	0.065	0.064	0.063	0.06	0.059
592	0.064	0.063	0.062	0.059	0.058
593	0.063	0.062	0.061	0.058	0.057
594	0.062	0.06	0.06	0.057	0.056
595	0.061	0.06	0.059	0.056	0.055
596	0.06	0.059	0.058	0.055	0.054
597	0.059	0.058	0.057	0.054	0.053
598	0.058	0.057	0.056	0.053	0.052
599	0.058	0.056	0.056	0.052	0.051
600	0.057	0.055	0.055	0.052	0.051
601	0.056	0.055	0.054	0.051	0.05
602	0.055	0.054	0.053	0.05	0.049
603	0.055	0.053	0.053	0.05	0.049
604	0.054	0.053	0.052	0.049	0.048
605	0.054	0.052	0.052	0.049	0.048
606	0.053	0.052	0.051	0.048	0.047
607	0.053	0.051	0.051	0.048	0.047
608	0.052	0.051	0.05	0.048	0.047
609	0.052	0.05	0.05	0.047	0.046
610	0.052	0.05	0.05	0.047	0.046
611	0.052	0.05	0.05	0.047	0.046
612	0.051	0.05	0.049	0.047	0.046
613	0.051	0.05	0.049	0.047	0.046
614	0.051	0.05	0.049	0.047	0.046
615	0.051	0.05	0.049	0.047	0.046
616	0.051	0.05	0.049	0.047	0.046
617	0.051	0.05	0.049	0.047	0.046
618	0.051	0.05	0.049	0.047	0.046
619	0.051	0.05	0.049	0.047	0.046
620	0.052	0.05	0.049	0.047	0.046
621	0.052	0.05	0.05	0.047	0.046
622	0.052	0.05	0.05	0.047	0.047
623	0.052	0.051	0.05	0.048	0.047
624	0.052	0.051	0.05	0.048	0.047
625	0.052	0.051	0.05	0.048	0.047
626	0.053	0.051	0.05	0.048	0.047
627	0.053	0.051	0.051	0.048	0.047
628	0.053	0.051	0.051	0.049	0.048
629	0.053	0.051	0.051	0.049	0.048
630	0.053	0.051	0.051	0.049	0.048
631	0.053	0.051	0.051	0.049	0.048
632	0.053	0.051	0.051	0.049	0.048
633	0.053	0.051	0.051	0.049	0.048
634	0.053	0.051	0.051	0.049	0.048
635	0.053	0.051	0.051	0.049	0.048
636	0.053	0.051	0.05	0.048	0.048
637	0.053	0.051	0.05	0.048	0.047
638	0.053	0.051	0.05	0.048	0.047
639	0.052	0.05	0.05	0.048	0.047
640	0.052	0.05	0.05	0.048	0.047
641	0.052	0.05	0.049	0.047	0.047
642	0.051	0.049	0.049	0.047	0.046
643	0.051	0.049	0.048	0.046	0.046
644	0.051	0.048	0.048	0.046	0.045
645	0.05	0.048	0.047	0.046	0.045
646	0.05	0.048	0.047	0.045	0.044
647	0.049	0.047	0.047	0.045	0.044
648	0.048	0.046	0.046	0.044	0.043
649	0.048	0.046	0.045	0.044	0.043
650	0.047	0.045	0.045	0.043	0.042
651	0.047	0.045	0.044	0.043	0.042
652	0.046	0.044	0.044	0.042	0.041
653	0.046	0.044	0.043	0.042	0.041
654	0.045	0.043	0.043	0.041	0.041
655	0.045	0.043	0.042	0.041	0.04
656	0.044	0.042	0.042	0.04	0.04
657	0.044	0.042	0.041	0.04	0.039
658	0.043	0.041	0.041	0.039	0.039
659	0.043	0.041	0.04	0.039	0.038
660	0.043	0.04	0.04	0.039	0.038
661	0.042	0.04	0.04	0.038	0.038
662	0.042	0.04	0.04	0.038	0.038
663	0.042	0.04	0.039	0.038	0.037
664	0.042	0.04	0.039	0.038	0.037
665	0.042	0.04	0.039	0.038	0.037
666	0.042	0.04	0.039	0.038	0.038
667	0.042	0.04	0.04	0.039	0.038
668	0.043	0.041	0.04	0.039	0.038
669	0.043	0.041	0.041	0.04	0.039
670	0.044	0.042	0.042	0.04	0.04
671	0.045	0.043	0.043	0.041	0.041
672	0.046	0.044	0.044	0.042	0.042
673	0.047	0.045	0.045	0.044	0.043
674	0.049	0.047	0.046	0.045	0.044
675	0.05	0.048	0.048	0.046	0.046
676	0.052	0.05	0.049	0.048	0.047
677	0.054	0.051	0.051	0.049	0.049
678	0.055	0.053	0.052	0.051	0.05
679	0.057	0.055	0.054	0.053	0.052
680	0.059	0.057	0.056	0.055	0.054
681	0.061	0.058	0.058	0.056	0.055
682	0.062	0.06	0.059	0.058	0.057
683	0.064	0.062	0.061	0.06	0.059
684	0.066	0.063	0.063	0.061	0.06
685	0.067	0.065	0.064	0.063	0.062
686	0.069	0.066	0.066	0.064	0.063
687	0.07	0.068	0.067	0.066	0.064
688	0.071	0.069	0.068	0.067	0.066
689	0.073	0.07	0.07	0.068	0.067
690	0.074	0.072	0.071	0.069	0.068
691	0.075	0.073	0.072	0.07	0.069
692	0.076	0.074	0.073	0.072	0.07
693	0.077	0.075	0.074	0.072	0.071
694	0.078	0.076	0.075	0.073	0.072
695	0.079	0.077	0.076	0.074	0.073
696	0.08	0.077	0.077	0.075	0.074
697	0.08	0.078	0.077	0.076	0.074
698	0.081	0.079	0.078	0.077	0.075
699	0.082	0.079	0.079	0.077	0.076
700	0.083	0.08	0.079	0.078	0.076

## Sheet: MO dye removal by AgNPs-M
Wavelength	0 min	30 mins	60 mins	90 mins	120 mins
nm
400	1.71	1.665	1.639	1.431	1.351
401	1.739	1.694	1.668	1.454	1.376
402	1.768	1.722	1.697	1.481	1.399
403	1.798	1.749	1.721	1.504	1.423
404	1.824	1.774	1.749	1.528	1.443
405	1.851	1.803	1.779	1.554	1.468
406	1.879	1.829	1.803	1.578	1.489
407	1.906	1.854	1.826	1.598	1.511
408	1.934	1.882	1.851	1.623	1.533
409	1.957	1.905	1.878	1.645	1.554
410	1.983	1.926	1.902	1.666	1.574
411	2.004	1.956	1.925	1.687	1.594
412	2.032	1.977	1.946	1.708	1.614
413	2.053	2.002	1.971	1.73	1.635
414	2.081	2.024	1.993	1.752	1.656
415	2.101	2.051	2.013	1.772	1.673
416	2.122	2.068	2.038	1.792	1.693
417	2.143	2.084	2.053	1.807	1.709
418	2.162	2.108	2.075	1.828	1.727
419	2.183	2.134	2.101	1.849	1.747
420	2.211	2.151	2.119	1.866	1.765
421	2.232	2.173	2.138	1.886	1.782
422	2.255	2.191	2.16	1.906	1.799
423	2.271	2.211	2.178	1.924	1.817
424	2.292	2.234	2.201	1.941	1.835
425	2.313	2.249	2.219	1.96	1.854
426	2.334	2.272	2.236	1.977	1.869
427	2.353	2.297	2.259	1.996	1.887
428	2.373	2.314	2.283	2.012	1.901
429	2.395	2.336	2.294	2.03	1.918
430	2.413	2.353	2.313	2.046	1.934
431	2.44	2.372	2.331	2.063	1.947
432	2.454	2.389	2.347	2.082	1.963
433	2.475	2.403	2.363	2.098	1.984
434	2.487	2.427	2.382	2.115	1.997
435	2.511	2.446	2.404	2.131	2.014
436	2.521	2.462	2.423	2.144	2.03
437	2.547	2.478	2.441	2.163	2.044
438	2.559	2.492	2.453	2.178	2.058
439	2.59	2.519	2.478	2.197	2.074
440	2.6	2.528	2.499	2.213	2.088
441	2.613	2.555	2.511	2.225	2.104
442	2.635	2.563	2.534	2.246	2.115
443	2.649	2.576	2.542	2.256	2.13
444	2.668	2.595	2.561	2.273	2.145
445	2.688	2.609	2.571	2.287	2.164
446	2.708	2.632	2.587	2.304	2.176
447	2.724	2.646	2.602	2.321	2.188
448	2.737	2.662	2.618	2.33	2.201
449	2.763	2.683	2.629	2.345	2.214
450	2.769	2.695	2.644	2.357	2.228
451	2.775	2.706	2.671	2.371	2.24
452	2.793	2.719	2.681	2.38	2.254
453	2.818	2.724	2.685	2.391	2.261
454	2.82	2.744	2.698	2.402	2.269
455	2.839	2.757	2.708	2.412	2.279
456	2.839	2.763	2.72	2.425	2.293
457	2.851	2.78	2.738	2.433	2.299
458	2.86	2.789	2.735	2.436	2.302
459	2.874	2.788	2.75	2.448	2.309
460	2.873	2.789	2.749	2.448	2.312
461	2.881	2.794	2.756	2.454	2.316
462	2.882	2.797	2.757	2.457	2.319
463	2.867	2.808	2.754	2.452	2.322
464	2.879	2.809	2.753	2.452	2.325
465	2.87	2.811	2.76	2.453	2.32
466	2.872	2.797	2.752	2.452	2.319
467	2.871	2.798	2.758	2.445	2.317
468	2.864	2.792	2.735	2.442	2.31
469	2.854	2.784	2.733	2.432	2.302
470	2.852	2.764	2.727	2.429	2.298
471	2.824	2.763	2.723	2.418	2.286
472	2.828	2.749	2.7	2.408	2.28
473	2.807	2.738	2.69	2.399	2.269
474	2.792	2.724	2.675	2.384	2.254
475	2.77	2.7	2.656	2.366	2.24
476	2.754	2.681	2.639	2.356	2.225
477	2.735	2.667	2.618	2.335	2.207
478	2.713	2.648	2.603	2.316	2.191
479	2.69	2.619	2.578	2.295	2.172
480	2.665	2.599	2.556	2.277	2.151
481	2.645	2.569	2.531	2.253	2.131
482	2.615	2.543	2.506	2.229	2.107
483	2.58	2.517	2.473	2.201	2.081
484	2.556	2.487	2.446	2.175	2.057
485	2.524	2.456	2.415	2.147	2.03
486	2.49	2.424	2.387	2.119	2.005
487	2.456	2.389	2.352	2.09	1.975
488	2.42	2.356	2.316	2.058	1.947
489	2.384	2.319	2.28	2.027	1.917
490	2.344	2.284	2.246	1.994	1.886
491	2.306	2.246	2.207	1.959	1.853
492	2.264	2.208	2.169	1.924	1.82
493	2.225	2.167	2.13	1.889	1.786
494	2.183	2.124	2.089	1.851	1.75
495	2.136	2.08	2.044	1.812	1.712
496	2.094	2.038	2.004	1.773	1.677
497	2.048	1.995	1.961	1.736	1.641
498	2.001	1.949	1.915	1.694	1.602
499	1.955	1.905	1.871	1.654	1.564
500	1.906	1.856	1.825	1.609	1.523
501	1.857	1.807	1.777	1.567	1.483
502	1.809	1.759	1.729	1.524	1.442
503	1.761	1.713	1.684	1.484	1.403
504	1.711	1.663	1.636	1.441	1.363
505	1.66	1.614	1.587	1.397	1.323
506	1.611	1.569	1.541	1.355	1.283
507	1.562	1.522	1.494	1.312	1.242
508	1.513	1.473	1.448	1.269	1.202
509	1.466	1.426	1.403	1.227	1.162
510	1.42	1.381	1.358	1.187	1.123
511	1.372	1.333	1.311	1.145	1.083
512	1.324	1.286	1.265	1.104	1.044
513	1.278	1.242	1.221	1.065	1.007
514	1.23	1.197	1.175	1.023	0.968
515	1.183	1.152	1.13	0.982	0.93
516	1.141	1.111	1.09	0.945	0.895
517	1.096	1.067	1.048	0.906	0.858
518	1.054	1.025	1.008	0.869	0.823
519	1.011	0.982	0.966	0.831	0.787
520	0.971	0.942	0.927	0.797	0.754
521	0.93	0.902	0.887	0.762	0.72
522	0.888	0.863	0.847	0.726	0.687
523	0.851	0.827	0.812	0.693	0.656
524	0.813	0.79	0.777	0.66	0.625
525	0.776	0.754	0.741	0.628	0.594
526	0.74	0.719	0.707	0.596	0.564
527	0.706	0.684	0.673	0.566	0.536
528	0.672	0.651	0.641	0.537	0.508
529	0.64	0.619	0.609	0.509	0.482
530	0.608	0.589	0.578	0.482	0.456
531	0.577	0.56	0.549	0.455	0.431
532	0.548	0.531	0.521	0.429	0.407
533	0.52	0.505	0.496	0.405	0.384
534	0.494	0.478	0.47	0.382	0.361
535	0.468	0.452	0.445	0.359	0.339
536	0.443	0.427	0.42	0.337	0.319
537	0.418	0.403	0.396	0.316	0.299
538	0.395	0.381	0.375	0.296	0.28
539	0.373	0.36	0.354	0.277	0.263
540	0.352	0.339	0.333	0.258	0.245
541	0.332	0.321	0.315	0.241	0.23
542	0.313	0.302	0.297	0.225	0.214
543	0.294	0.283	0.279	0.208	0.198
544	0.277	0.266	0.262	0.193	0.184
545	0.261	0.25	0.246	0.179	0.17
546	0.245	0.235	0.23	0.165	0.157
547	0.23	0.22	0.216	0.152	0.145
548	0.215	0.207	0.202	0.14	0.134
549	0.202	0.193	0.189	0.128	0.122
550	0.188	0.18	0.177	0.116	0.111
551	0.177	0.168	0.165	0.106	0.101
552	0.165	0.157	0.154	0.096	0.092
553	0.154	0.146	0.144	0.086	0.083
554	0.144	0.137	0.134	0.078	0.075
555	0.135	0.127	0.125	0.07	0.068
556	0.126	0.119	0.116	0.062	0.061
557	0.118	0.111	0.109	0.055	0.054
558	0.11	0.104	0.101	0.048	0.048
559	0.103	0.097	0.095	0.042	0.042
560	0.097	0.09	0.088	0.036	0.037
561	0.09	0.084	0.082	0.031	0.032
562	0.084	0.078	0.076	0.025	0.027
563	0.079	0.072	0.071	0.021	0.022
564	0.074	0.067	0.066	0.016	0.018
565	0.069	0.063	0.061	0.012	0.015
566	0.064	0.059	0.057	0.008	0.011
567	0.06	0.054	0.053	0.005	0.008
568	0.056	0.05	0.049	0.001	0.005
569	0.053	0.047	0.046	-0.002	0.002
570	0.049	0.044	0.042	-0.005	-0.001
571	0.046	0.04	0.039	-0.008	-0.003
572	0.043	0.038	0.037	-0.01	-0.006
573	0.04	0.035	0.034	-0.013	-0.008
574	0.038	0.032	0.031	-0.015	-0.01
575	0.035	0.03	0.029	-0.017	-0.012
576	0.033	0.028	0.027	-0.019	-0.013
577	0.031	0.026	0.025	-0.021	-0.015
578	0.029	0.024	0.023	-0.022	-0.017
579	0.027	0.022	0.021	-0.024	-0.018
580	0.025	0.02	0.019	-0.025	-0.019
581	0.023	0.019	0.018	-0.027	-0.02
582	0.022	0.017	0.016	-0.028	-0.021
583	0.02	0.016	0.015	-0.029	-0.023
584	0.019	0.014	0.014	-0.03	-0.024
585	0.018	0.013	0.012	-0.032	-0.025
586	0.016	0.012	0.011	-0.033	-0.026
587	0.016	0.011	0.01	-0.033	-0.026
588	0.014	0.01	0.009	-0.034	-0.027
589	0.013	0.009	0.008	-0.035	-0.028
590	0.012	0.008	0.007	-0.036	-0.029
591	0.011	0.007	0.006	-0.037	-0.03
592	0.01	0.006	0.005	-0.038	-0.03
593	0.009	0.005	0.004	-0.038	-0.031
594	0.008	0.004	0.003	-0.039	-0.032
595	0.008	0.003	0.003	-0.04	-0.032
596	0.007	0.002	0.002	-0.04	-0.033
597	0.006	0.002	0.001	-0.041	-0.034
598	0.005	0.001	0.001	-0.042	-0.034
599	0.005	0	0	-0.042	-0.035
600	0.004	0	-0.001	-0.042	-0.035
601	0.003	-0.001	-0.001	-0.043	-0.036
602	0.003	-0.002	-0.002	-0.043	-0.036
603	0.002	-0.002	-0.002	-0.044	-0.037
604	0.001	-0.003	-0.003	-0.044	-0.037
605	0.001	-0.003	-0.003	-0.044	-0.038
606	0.001	-0.003	-0.003	-0.045	-0.038
607	0	-0.004	-0.004	-0.045	-0.038
608	0	-0.004	-0.004	-0.045	-0.038
609	0	-0.004	-0.004	-0.045	-0.039
610	-0.001	-0.005	-0.004	-0.045	-0.039
611	-0.001	-0.005	-0.004	-0.045	-0.039
612	-0.001	-0.005	-0.005	-0.045	-0.039
613	-0.001	-0.005	-0.005	-0.045	-0.039
614	-0.001	-0.005	-0.004	-0.045	-0.038
615	-0.001	-0.005	-0.004	-0.045	-0.038
616	-0.001	-0.005	-0.004	-0.045	-0.038
617	-0.001	-0.004	-0.004	-0.044	-0.038
618	-0.001	-0.004	-0.004	-0.044	-0.038
619	0	-0.004	-0.004	-0.044	-0.037
620	0	-0.004	-0.003	-0.044	-0.037
621	0	-0.004	-0.003	-0.043	-0.037
622	0	-0.003	-0.003	-0.043	-0.036
623	0	-0.003	-0.003	-0.043	-0.036
624	0.001	-0.003	-0.003	-0.042	-0.036
625	0.001	-0.003	-0.002	-0.042	-0.035
626	0.001	-0.003	-0.002	-0.042	-0.035
627	0.001	-0.002	-0.002	-0.041	-0.035
628	0.001	-0.002	-0.002	-0.041	-0.034
629	0.001	-0.002	-0.001	-0.041	-0.034
630	0.001	-0.002	-0.001	-0.041	-0.034
631	0.002	-0.002	-0.001	-0.04	-0.034
632	0.002	-0.002	-0.001	-0.04	-0.033
633	0.002	-0.002	-0.001	-0.04	-0.033
634	0.002	-0.002	-0.001	-0.04	-0.033
635	0.002	-0.001	-0.001	-0.04	-0.033
636	0.001	-0.002	-0.001	-0.04	-0.033
637	0.001	-0.002	-0.001	-0.04	-0.033
638	0.001	-0.002	-0.001	-0.04	-0.033
639	0.001	-0.002	-0.001	-0.04	-0.032
640	0.001	-0.002	-0.001	-0.04	-0.033
641	0	-0.002	-0.002	-0.04	-0.033
642	0	-0.003	-0.002	-0.04	-0.033
643	0	-0.003	-0.002	-0.041	-0.033
644	-0.001	-0.003	-0.003	-0.041	-0.033
645	-0.001	-0.004	-0.003	-0.041	-0.033
646	-0.002	-0.004	-0.003	-0.041	-0.033
647	-0.002	-0.005	-0.004	-0.042	-0.034
648	-0.003	-0.005	-0.004	-0.042	-0.034
649	-0.003	-0.005	-0.005	-0.042	-0.034
650	-0.004	-0.006	-0.005	-0.042	-0.035
651	-0.004	-0.006	-0.005	-0.043	-0.035
652	-0.005	-0.007	-0.006	-0.043	-0.035
653	-0.005	-0.007	-0.006	-0.044	-0.036
654	-0.006	-0.008	-0.006	-0.044	-0.036
655	-0.006	-0.008	-0.007	-0.044	-0.036
656	-0.007	-0.009	-0.007	-0.044	-0.037
657	-0.007	-0.009	-0.008	-0.045	-0.037
658	-0.007	-0.009	-0.008	-0.045	-0.037
659	-0.008	-0.01	-0.008	-0.045	-0.037
660	-0.008	-0.01	-0.009	-0.045	-0.038
661	-0.008	-0.01	-0.009	-0.045	-0.038
662	-0.009	-0.01	-0.009	-0.045	-0.038
663	-0.009	-0.01	-0.009	-0.046	-0.038
664	-0.009	-0.011	-0.009	-0.046	-0.038
665	-0.009	-0.01	-0.009	-0.046	-0.038
666	-0.009	-0.01	-0.009	-0.045	-0.038
667	-0.008	-0.01	-0.009	-0.045	-0.037
668	-0.008	-0.009	-0.008	-0.045	-0.037
669	-0.007	-0.009	-0.008	-0.044	-0.037
670	-0.006	-0.008	-0.007	-0.043	-0.036
671	-0.005	-0.007	-0.006	-0.043	-0.035
672	-0.004	-0.006	-0.005	-0.042	-0.035
673	-0.003	-0.005	-0.004	-0.041	-0.034
674	-0.002	-0.004	-0.003	-0.039	-0.033
675	0	-0.003	-0.001	-0.038	-0.032
676	0.001	-0.001	0	-0.037	-0.031
677	0.003	0.001	0.001	-0.035	-0.029
678	0.005	0.002	0.003	-0.034	-0.028
679	0.006	0.004	0.005	-0.033	-0.027
680	0.008	0.005	0.006	-0.031	-0.026
681	0.01	0.007	0.007	-0.03	-0.025
682	0.012	0.009	0.009	-0.028	-0.023
683	0.013	0.01	0.011	-0.027	-0.022
684	0.015	0.012	0.012	-0.025	-0.021
685	0.016	0.013	0.013	-0.024	-0.02
686	0.018	0.014	0.015	-0.023	-0.019
687	0.019	0.016	0.016	-0.022	-0.018
688	0.021	0.017	0.017	-0.02	-0.017
689	0.022	0.018	0.018	-0.019	-0.016
690	0.023	0.019	0.019	-0.018	-0.015
691	0.024	0.02	0.02	-0.017	-0.015
692	0.025	0.021	0.021	-0.016	-0.014
693	0.026	0.022	0.022	-0.016	-0.013
694	0.027	0.023	0.023	-0.015	-0.012
695	0.028	0.024	0.024	-0.014	-0.012
696	0.029	0.025	0.025	-0.013	-0.011
697	0.03	0.025	0.025	-0.013	-0.01
698	0.031	0.026	0.026	-0.012	-0.01
699	0.031	0.027	0.027	-0.011	-0.009
700	0.032	0.027	0.027	-0.011	-0.009

## Sheet: MO dye removal by AgNPs -K
Wavelength	0 min	30 mins	60 mins	90 mins	120 mins
nm
400	2.009	1.996	1.944	1.817	1.703
401	2.047	2.031	1.978	1.851	1.735
402	2.084	2.07	2.016	1.886	1.762
403	2.12	2.101	2.047	1.913	1.792
404	2.149	2.13	2.079	1.941	1.817
405	2.185	2.164	2.107	1.976	1.849
406	2.22	2.196	2.145	2.006	1.878
407	2.246	2.228	2.174	2.034	1.901
408	2.287	2.262	2.21	2.056	1.93
409	2.312	2.294	2.231	2.09	1.956
410	2.336	2.319	2.26	2.115	1.98
411	2.375	2.351	2.289	2.141	2.006
412	2.397	2.377	2.326	2.163	2.033
413	2.434	2.413	2.342	2.194	2.054
414	2.457	2.437	2.386	2.221	2.081
415	2.488	2.458	2.402	2.247	2.101
416	2.517	2.497	2.432	2.272	2.124
417	2.52	2.513	2.439	2.292	2.143
418	2.554	2.531	2.473	2.313	2.168
419	2.584	2.557	2.502	2.34	2.193
420	2.625	2.578	2.513	2.365	2.211
421	2.629	2.603	2.548	2.384	2.23
422	2.669	2.639	2.565	2.411	2.257
423	2.686	2.658	2.58	2.431	2.278
424	2.712	2.676	2.622	2.453	2.299
425	2.734	2.708	2.649	2.465	2.315
426	2.75	2.737	2.661	2.494	2.344
427	2.783	2.765	2.681	2.518	2.362
428	2.818	2.787	2.706	2.543	2.382
429	2.819	2.804	2.742	2.557	2.403
430	2.851	2.831	2.752	2.577	2.418
431	2.873	2.855	2.773	2.596	2.443
432	2.906	2.881	2.798	2.619	2.457
433	2.948	2.91	2.817	2.651	2.479
434	2.953	2.925	2.826	2.665	2.498
435	2.976	2.946	2.861	2.694	2.52
436	2.973	2.969	2.881	2.701	2.537
437	3.002	2.965	2.882	2.72	2.555
438	3.026	2.995	2.937	2.751	2.583
439	3.05	3.014	2.955	2.758	2.593
440	3.077	3.044	2.973	2.769	2.601
441	3.089	3.079	2.982	2.795	2.623
442	3.112	3.098	2.997	2.825	2.644
443	3.121	3.113	3.025	2.823	2.669
444	3.147	3.13	3.033	2.861	2.677
445	3.175	3.156	3.065	2.877	2.699
446	3.187	3.149	3.087	2.906	2.711
447	3.229	3.192	3.103	2.912	2.728
448	3.25	3.199	3.144	2.935	2.749
449	3.268	3.174	3.148	2.963	2.763
450	3.266	3.222	3.147	2.958	2.775
451	3.295	3.222	3.162	2.966	2.792
452	3.304	3.27	3.184	2.985	2.812
453	3.313	3.26	3.197	2.995	2.83
454	3.336	3.289	3.241	3.008	2.819
455	3.35	3.328	3.209	3.019	2.839
456	3.346	3.318	3.247	3.035	2.849
457	3.371	3.324	3.236	3.055	2.86
458	3.36	3.312	3.255	3.053	2.869
459	3.366	3.343	3.278	3.061	2.871
460	3.387	3.301	3.287	3.054	2.882
461	3.387	3.358	3.256	3.075	2.884
462	3.373	3.348	3.296	3.054	2.893
463	3.394	3.347	3.281	3.079	2.88
464	3.38	3.354	3.278	3.085	2.883
465	3.38	3.364	3.271	3.067	2.892
466	3.398	3.347	3.26	3.073	2.887
467	3.367	3.343	3.291	3.07	2.878
468	3.398	3.333	3.254	3.054	2.875
469	3.361	3.326	3.249	3.06	2.873
470	3.357	3.315	3.228	3.036	2.863
471	3.336	3.307	3.241	3.026	2.84
472	3.33	3.273	3.191	3.01	2.83
473	3.309	3.287	3.196	2.99	2.806
474	3.285	3.238	3.179	2.987	2.805
475	3.269	3.226	3.174	2.962	2.783
476	3.261	3.217	3.149	2.948	2.77
477	3.239	3.203	3.129	2.927	2.752
478	3.226	3.173	3.099	2.907	2.721
479	3.176	3.158	3.077	2.883	2.704
480	3.157	3.119	3.042	2.865	2.676
481	3.123	3.098	3.015	2.823	2.65
482	3.084	3.052	2.972	2.799	2.626
483	3.063	3.027	2.95	2.764	2.591
484	3.016	2.98	2.915	2.726	2.568
485	2.983	2.95	2.882	2.696	2.534
486	2.947	2.913	2.843	2.664	2.501
487	2.908	2.873	2.806	2.626	2.465
488	2.861	2.83	2.77	2.592	2.431
489	2.823	2.784	2.724	2.553	2.395
490	2.78	2.745	2.679	2.507	2.356
491	2.739	2.7	2.638	2.464	2.317
492	2.681	2.651	2.591	2.424	2.277
493	2.635	2.605	2.543	2.381	2.234
494	2.587	2.554	2.496	2.335	2.191
495	2.536	2.5	2.442	2.288	2.146
496	2.484	2.449	2.395	2.241	2.101
497	2.433	2.401	2.342	2.193	2.058
498	2.373	2.344	2.29	2.14	2.01
499	2.32	2.291	2.236	2.09	1.963
500	2.258	2.232	2.179	2.036	1.913
501	2.202	2.175	2.123	1.985	1.863
502	2.143	2.116	2.067	1.933	1.813
503	2.09	2.061	2.014	1.882	1.765
504	2.03	2.002	1.957	1.83	1.715
505	1.97	1.944	1.899	1.775	1.665
506	1.912	1.889	1.844	1.724	1.618
507	1.853	1.831	1.787	1.67	1.568
508	1.793	1.774	1.731	1.618	1.518
509	1.737	1.718	1.676	1.566	1.469
510	1.681	1.662	1.624	1.517	1.422
511	1.623	1.606	1.569	1.466	1.373
512	1.567	1.549	1.514	1.414	1.324
513	1.513	1.497	1.462	1.366	1.28
514	1.456	1.442	1.407	1.314	1.233
515	1.401	1.388	1.354	1.264	1.186
516	1.351	1.339	1.305	1.219	1.143
517	1.297	1.286	1.254	1.171	1.098
518	1.246	1.236	1.205	1.126	1.055
519	1.196	1.184	1.157	1.08	1.011
520	1.148	1.137	1.111	1.037	0.97
521	1.099	1.089	1.064	0.993	0.929
522	1.05	1.042	1.016	0.949	0.888
523	1.005	0.999	0.973	0.908	0.851
524	0.96	0.955	0.93	0.868	0.813
525	0.915	0.911	0.887	0.828	0.775
526	0.872	0.869	0.846	0.789	0.739
527	0.831	0.828	0.807	0.753	0.703
528	0.792	0.788	0.769	0.717	0.669
529	0.753	0.75	0.731	0.682	0.637
530	0.716	0.714	0.695	0.648	0.606
531	0.679	0.679	0.66	0.615	0.575
532	0.644	0.645	0.626	0.583	0.545
533	0.611	0.613	0.595	0.554	0.517
534	0.579	0.581	0.564	0.525	0.49
535	0.548	0.55	0.534	0.497	0.463
536	0.518	0.52	0.506	0.47	0.438
537	0.489	0.491	0.478	0.444	0.413
538	0.463	0.465	0.452	0.42	0.39
539	0.437	0.439	0.427	0.396	0.369
540	0.411	0.415	0.402	0.373	0.347
541	0.388	0.393	0.38	0.352	0.328
542	0.366	0.371	0.358	0.332	0.309
543	0.343	0.348	0.336	0.312	0.289
544	0.323	0.328	0.317	0.294	0.271
545	0.303	0.308	0.298	0.276	0.254
546	0.285	0.29	0.28	0.259	0.239
547	0.267	0.272	0.263	0.243	0.224
548	0.25	0.256	0.247	0.228	0.21
549	0.234	0.24	0.231	0.213	0.196
550	0.218	0.225	0.216	0.199	0.182
551	0.204	0.211	0.202	0.186	0.17
552	0.191	0.197	0.189	0.174	0.159
553	0.178	0.185	0.177	0.162	0.148
554	0.167	0.173	0.166	0.152	0.138
555	0.156	0.162	0.155	0.141	0.128
556	0.146	0.152	0.145	0.132	0.119
557	0.137	0.143	0.135	0.124	0.111
558	0.128	0.134	0.127	0.115	0.104
559	0.119	0.126	0.119	0.108	0.096
560	0.112	0.118	0.111	0.101	0.09
561	0.105	0.111	0.104	0.094	0.083
562	0.098	0.104	0.097	0.088	0.077
563	0.092	0.097	0.091	0.082	0.072
564	0.086	0.092	0.085	0.076	0.067
565	0.081	0.086	0.08	0.071	0.062
566	0.076	0.081	0.075	0.066	0.057
567	0.071	0.076	0.07	0.062	0.053
568	0.067	0.072	0.066	0.058	0.049
569	0.063	0.067	0.061	0.054	0.045
570	0.059	0.064	0.058	0.05	0.042
571	0.056	0.06	0.054	0.047	0.039
572	0.053	0.057	0.051	0.044	0.036
573	0.05	0.053	0.048	0.041	0.033
574	0.047	0.051	0.045	0.038	0.031
575	0.045	0.048	0.042	0.036	0.028
576	0.042	0.045	0.04	0.033	0.026
577	0.04	0.043	0.037	0.031	0.024
578	0.038	0.041	0.035	0.029	0.022
579	0.036	0.039	0.033	0.027	0.02
580	0.035	0.037	0.031	0.025	0.018
581	0.033	0.035	0.029	0.023	0.016
582	0.031	0.033	0.028	0.022	0.015
583	0.03	0.031	0.026	0.02	0.013
584	0.029	0.03	0.025	0.019	0.012
585	0.028	0.029	0.023	0.017	0.011
586	0.026	0.027	0.022	0.016	0.009
587	0.025	0.026	0.021	0.015	0.008
588	0.024	0.025	0.02	0.014	0.007
589	0.024	0.024	0.018	0.013	0.006
590	0.023	0.022	0.017	0.012	0.005
591	0.022	0.022	0.016	0.011	0.004
592	0.021	0.02	0.015	0.01	0.003
593	0.02	0.019	0.014	0.009	0.002
594	0.02	0.019	0.013	0.008	0.001
595	0.019	0.018	0.012	0.007	0
596	0.018	0.017	0.012	0.006	0
597	0.018	0.016	0.011	0.005	-0.001
598	0.017	0.015	0.01	0.005	-0.002
599	0.016	0.014	0.009	0.004	-0.002
600	0.016	0.014	0.008	0.003	-0.003
601	0.016	0.013	0.008	0.003	-0.004
602	0.015	0.012	0.007	0.002	-0.004
603	0.015	0.012	0.007	0.001	-0.005
604	0.014	0.011	0.006	0.001	-0.005
605	0.014	0.011	0.006	0.001	-0.006
606	0.014	0.01	0.005	0	-0.006
607	0.013	0.01	0.005	0	-0.006
608	0.013	0.01	0.005	-0.001	-0.007
609	0.013	0.01	0.004	-0.001	-0.007
610	0.013	0.009	0.004	-0.001	-0.007
611	0.013	0.009	0.004	-0.001	-0.007
612	0.013	0.009	0.004	-0.001	-0.007
613	0.013	0.009	0.004	-0.001	-0.007
614	0.013	0.009	0.004	-0.001	-0.007
615	0.013	0.009	0.004	-0.001	-0.007
616	0.013	0.009	0.004	-0.001	-0.007
617	0.013	0.009	0.004	-0.001	-0.007
618	0.013	0.01	0.004	-0.001	-0.007
619	0.013	0.01	0.004	-0.001	-0.007
620	0.013	0.01	0.005	-0.001	-0.006
621	0.013	0.01	0.005	0	-0.006
622	0.014	0.01	0.005	0	-0.006
623	0.014	0.011	0.005	0	-0.006
624	0.014	0.011	0.006	0	-0.006
625	0.014	0.011	0.006	0.001	-0.005
626	0.014	0.011	0.006	0.001	-0.005
627	0.014	0.012	0.006	0.001	-0.005
628	0.014	0.012	0.007	0.001	-0.005
629	0.015	0.012	0.007	0.001	-0.004
630	0.015	0.012	0.007	0.002	-0.004
631	0.015	0.012	0.007	0.002	-0.004
632	0.015	0.012	0.007	0.002	-0.004
633	0.015	0.012	0.007	0.002	-0.004
634	0.015	0.012	0.007	0.002	-0.004
635	0.015	0.012	0.007	0.002	-0.004
636	0.015	0.012	0.007	0.002	-0.004
637	0.014	0.012	0.007	0.001	-0.004
638	0.014	0.012	0.006	0.001	-0.004
639	0.014	0.012	0.006	0.001	-0.004
640	0.014	0.011	0.006	0.001	-0.005
641	0.013	0.011	0.005	0.001	-0.005
642	0.013	0.011	0.005	0	-0.005
643	0.013	0.01	0.005	0	-0.006
644	0.013	0.01	0.004	0	-0.006
645	0.012	0.009	0.004	-0.001	-0.006
646	0.012	0.009	0.003	-0.001	-0.007
647	0.011	0.009	0.003	-0.002	-0.007
648	0.011	0.008	0.002	-0.002	-0.008
649	0.011	0.008	0.002	-0.003	-0.008
650	0.01	0.007	0.001	-0.003	-0.009
651	0.01	0.007	0.001	-0.004	-0.009
652	0.01	0.006	0	-0.004	-0.01
653	0.009	0.006	0	-0.004	-0.01
654	0.009	0.005	-0.001	-0.005	-0.01
655	0.008	0.005	-0.001	-0.005	-0.011
656	0.008	0.004	-0.001	-0.006	-0.011
657	0.008	0.004	-0.002	-0.006	-0.012
658	0.007	0.004	-0.002	-0.006	-0.012
659	0.007	0.003	-0.002	-0.007	-0.012
660	0.007	0.003	-0.002	-0.007	-0.012
661	0.007	0.003	-0.003	-0.007	-0.012
662	0.006	0.003	-0.003	-0.007	-0.013
663	0.006	0.002	-0.003	-0.007	-0.013
664	0.006	0.002	-0.003	-0.008	-0.013
665	0.006	0.002	-0.003	-0.007	-0.013
666	0.006	0.003	-0.002	-0.007	-0.012
667	0.007	0.003	-0.002	-0.007	-0.012
668	0.007	0.003	-0.001	-0.006	-0.011
669	0.008	0.004	-0.001	-0.006	-0.011
670	0.008	0.005	0	-0.005	-0.01
671	0.009	0.006	0.001	-0.004	-0.009
672	0.01	0.007	0.002	-0.003	-0.008
673	0.01	0.008	0.004	-0.001	-0.006
674	0.012	0.01	0.005	0	-0.005
675	0.013	0.011	0.006	0.001	-0.004
676	0.014	0.013	0.008	0.003	-0.002
677	0.015	0.015	0.01	0.005	0
678	0.016	0.016	0.012	0.006	0.001
679	0.018	0.018	0.013	0.008	0.003
680	0.019	0.02	0.015	0.01	0.005
681	0.02	0.022	0.017	0.012	0.007
682	0.021	0.024	0.019	0.014	0.008
683	0.023	0.025	0.021	0.015	0.01
684	0.024	0.027	0.022	0.017	0.012
685	0.025	0.028	0.024	0.018	0.013
686	0.026	0.03	0.026	0.02	0.015
687	0.027	0.031	0.027	0.021	0.016
688	0.028	0.033	0.028	0.023	0.018
689	0.029	0.034	0.03	0.024	0.019
690	0.03	0.035	0.031	0.025	0.02
691	0.031	0.037	0.032	0.026	0.021
692	0.031	0.038	0.033	0.027	0.022
693	0.032	0.039	0.034	0.028	0.023
694	0.033	0.04	0.035	0.029	0.024
695	0.033	0.041	0.036	0.03	0.025
696	0.034	0.041	0.037	0.031	0.026
697	0.034	0.042	0.038	0.032	0.027
698	0.035	0.043	0.039	0.033	0.028
699	0.035	0.044	0.039	0.033	0.028
700	0.036	0.044	0.04	0.034	0.029
